# Supplementary material
Source: PubMed Central journal article supplement (PMC11215857)
Supplement: NIHPP2024.01.04.574177v4-supplement-9.pdf [file NIHPP2024.01.04.574177v4-supplement-9.pdf]

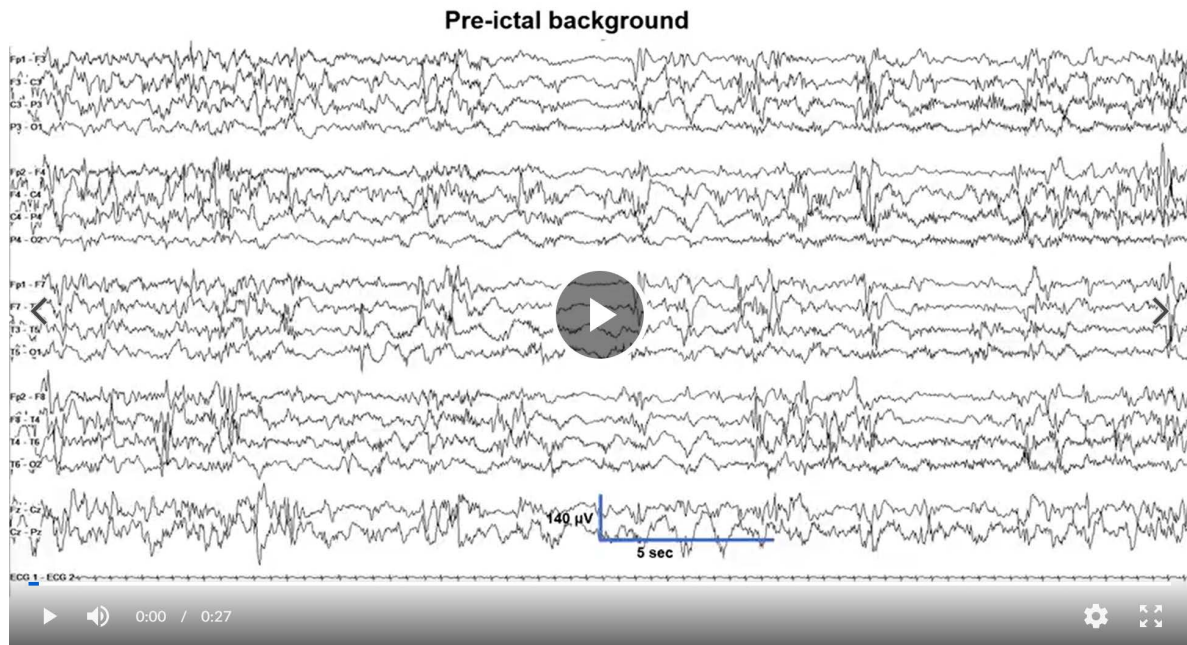

Figure 1—figure supplement 1

### Awake

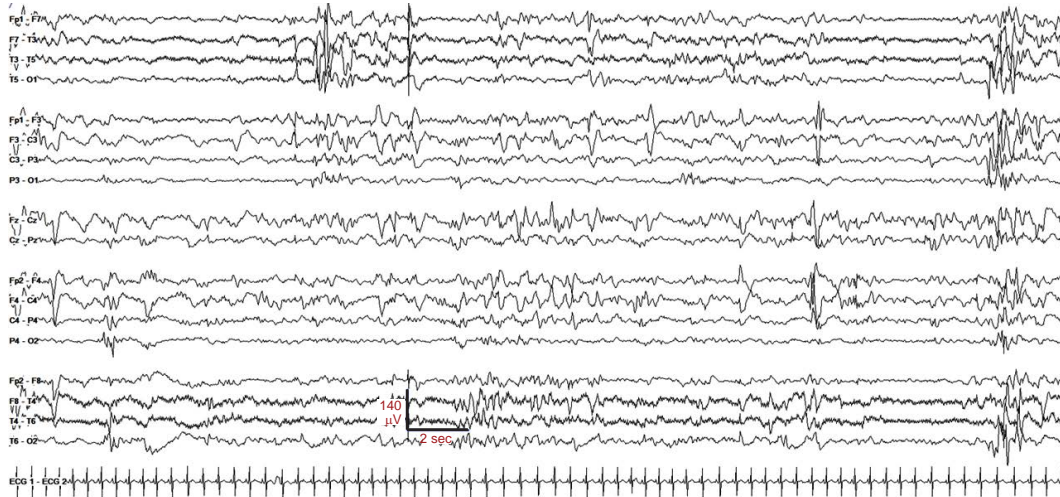

### Asleep, same day (LFF 1 Hz added)

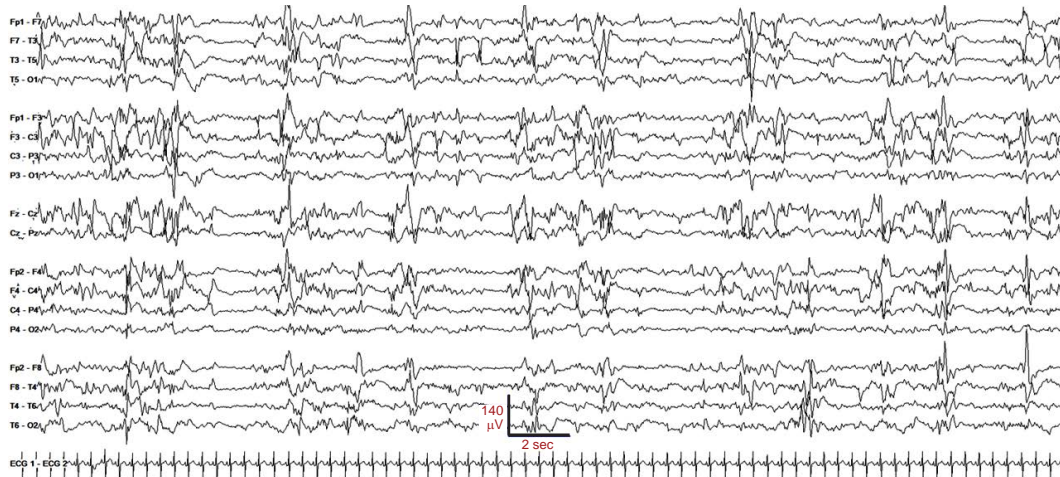

Figure 1—figure supplement 2

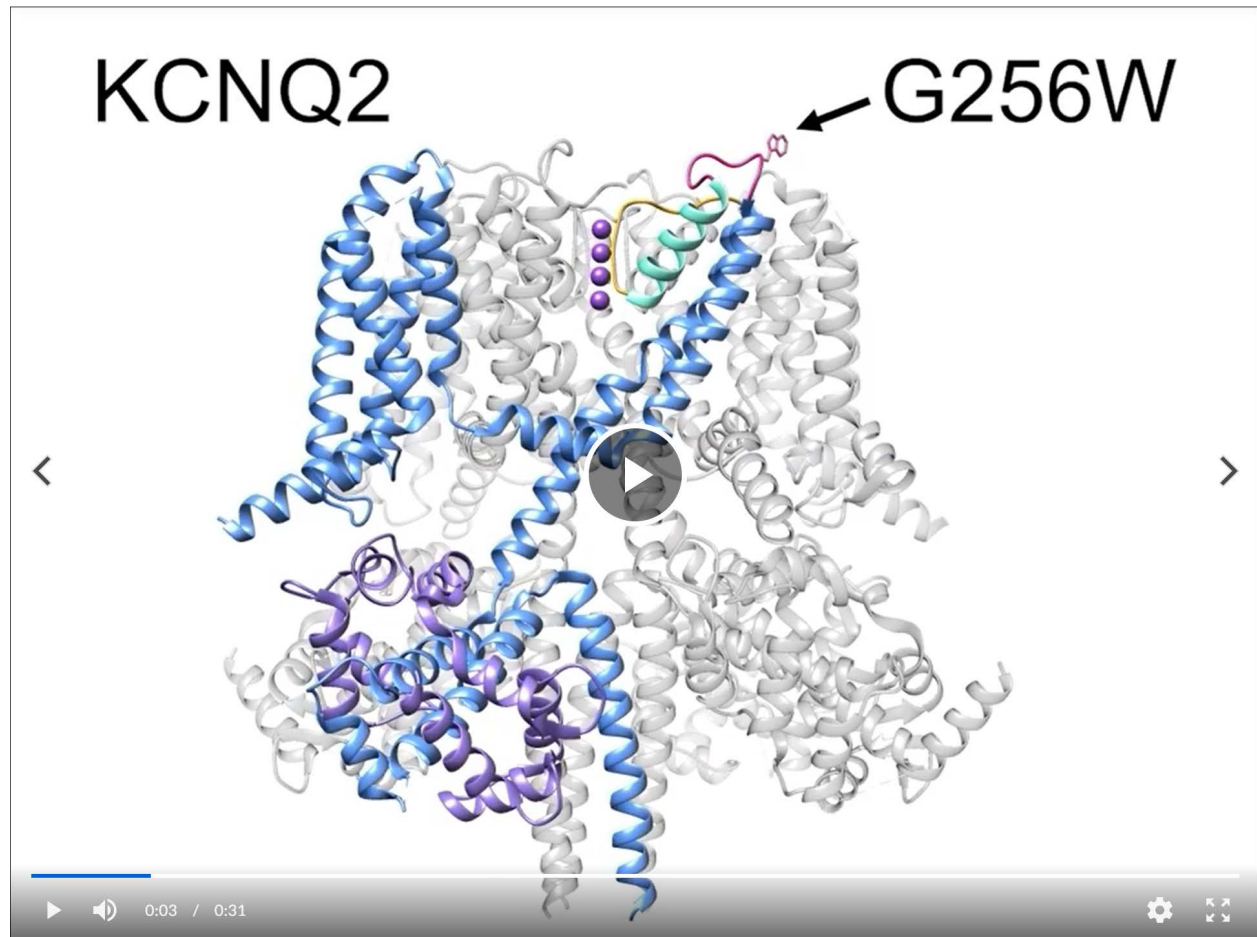

Figure 2—figure supplement 1

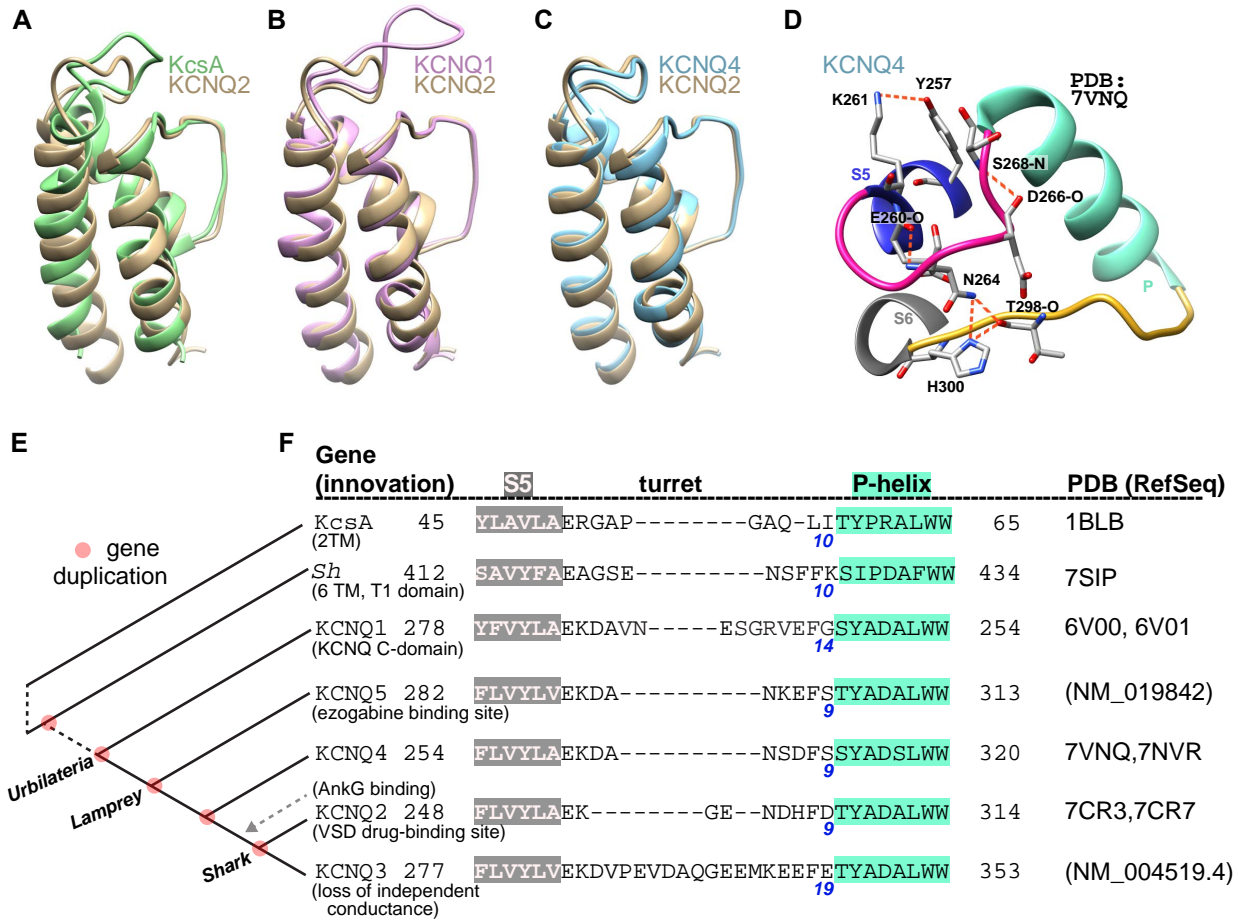

Figure 2—figure supplement 2

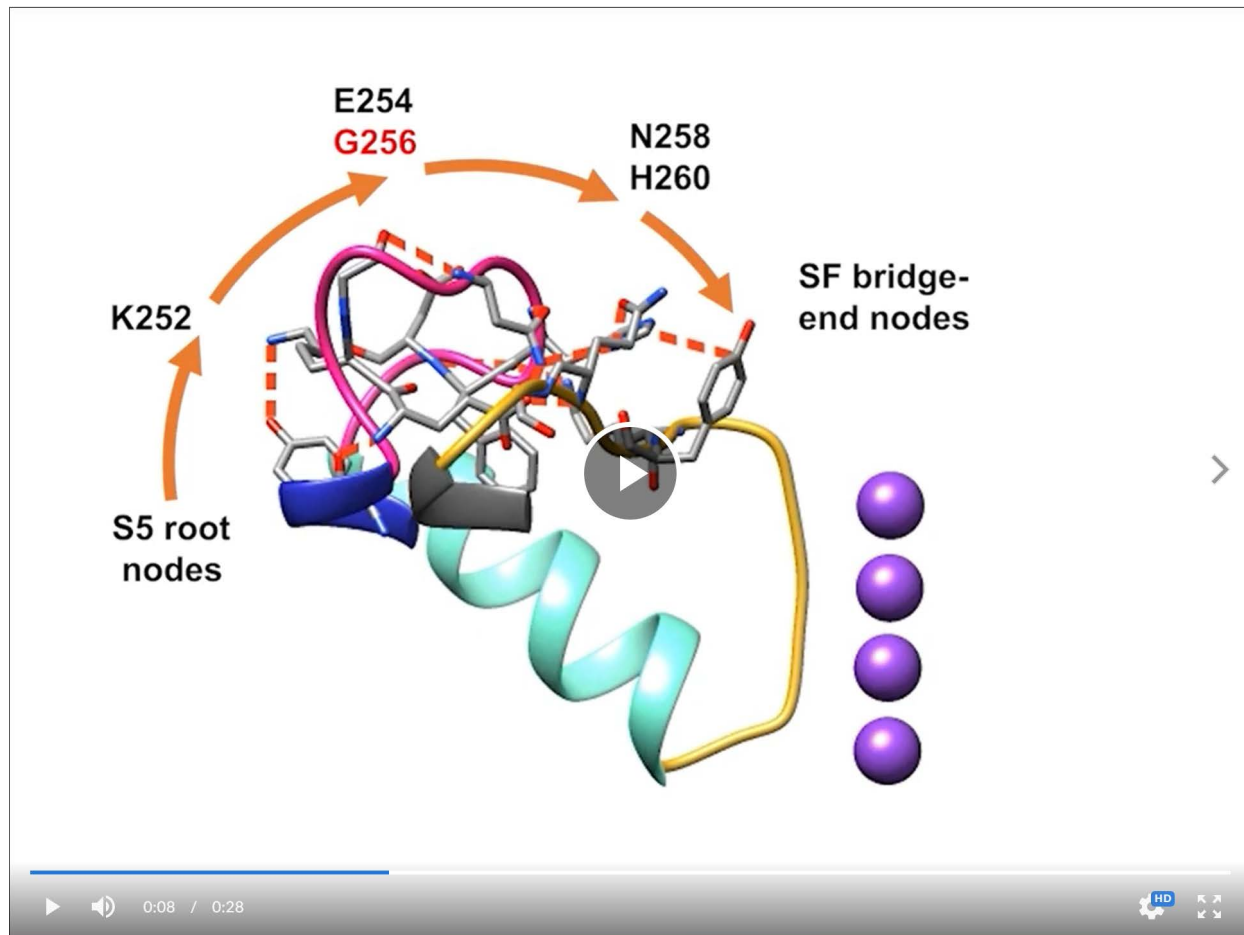

Figure 2—figure supplement 3

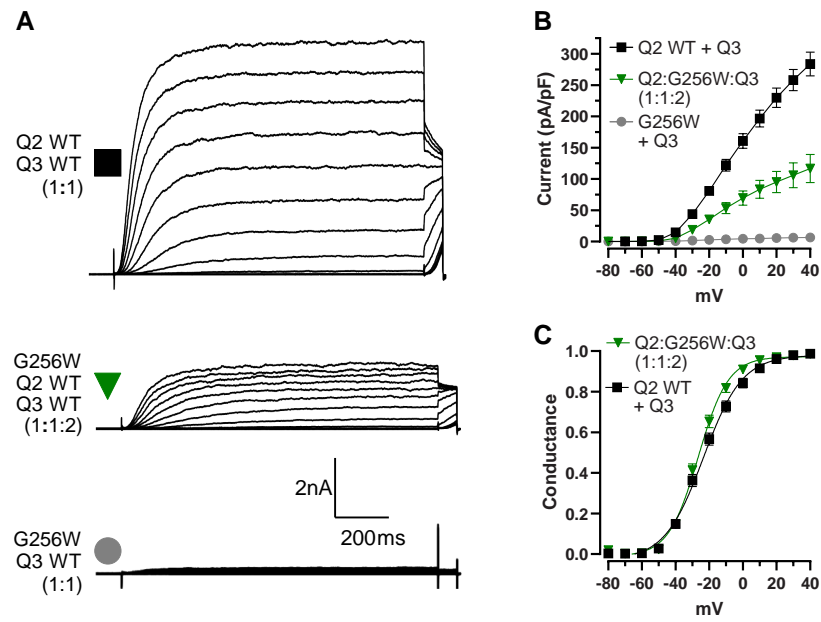

Figure 3—figure supplement 1

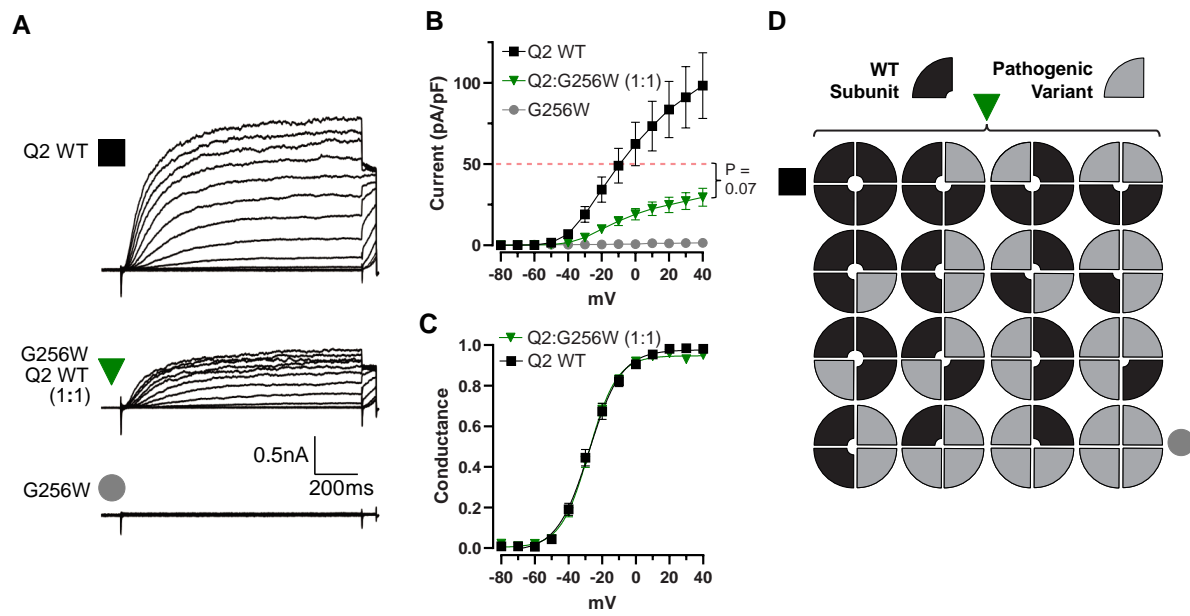

Figure 3—figure supplement 2

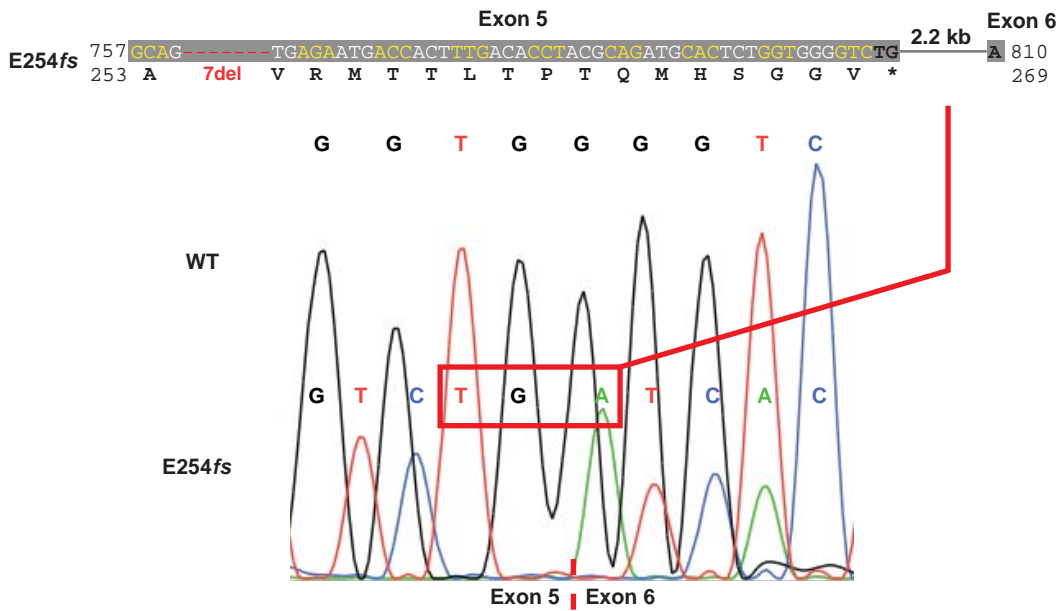

Figure 4—figure supplement 1



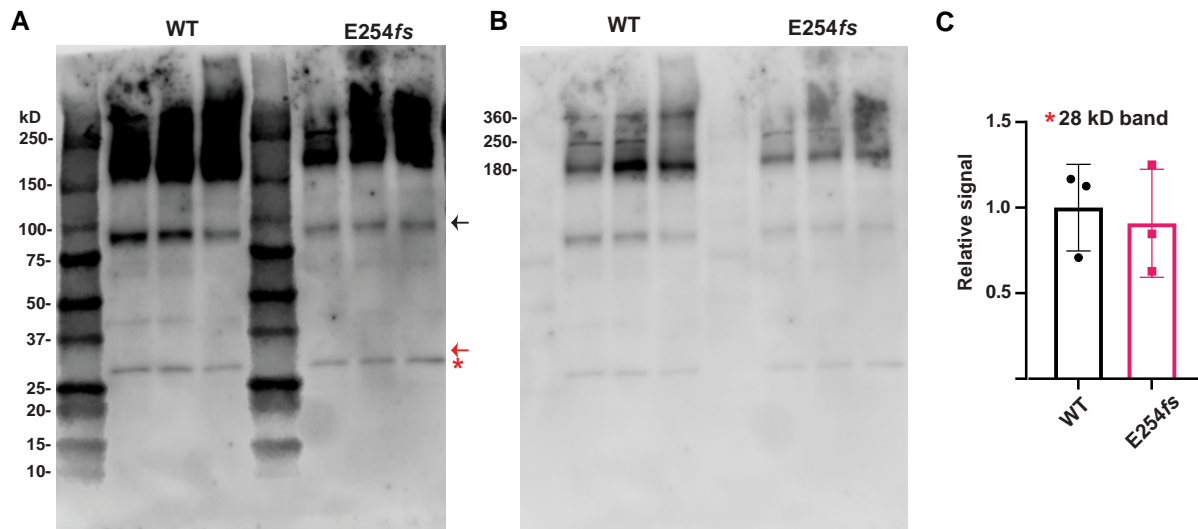

Figure 4—figure supplement 2

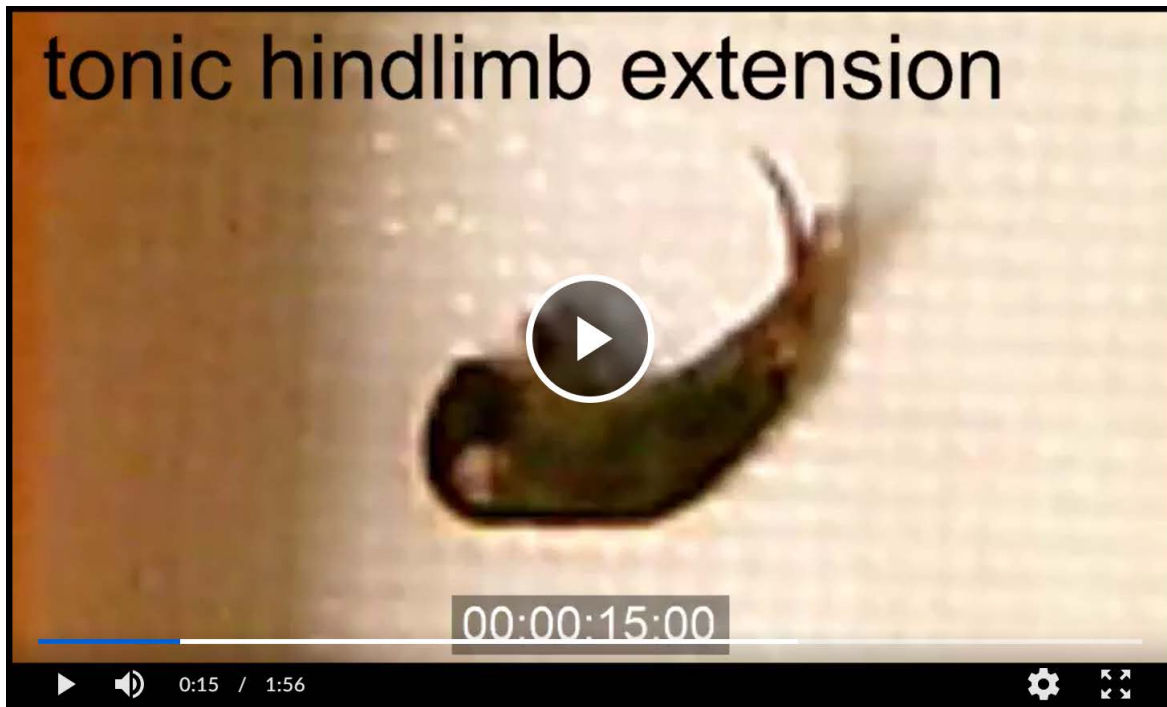

Figure 4—figure supplement 3

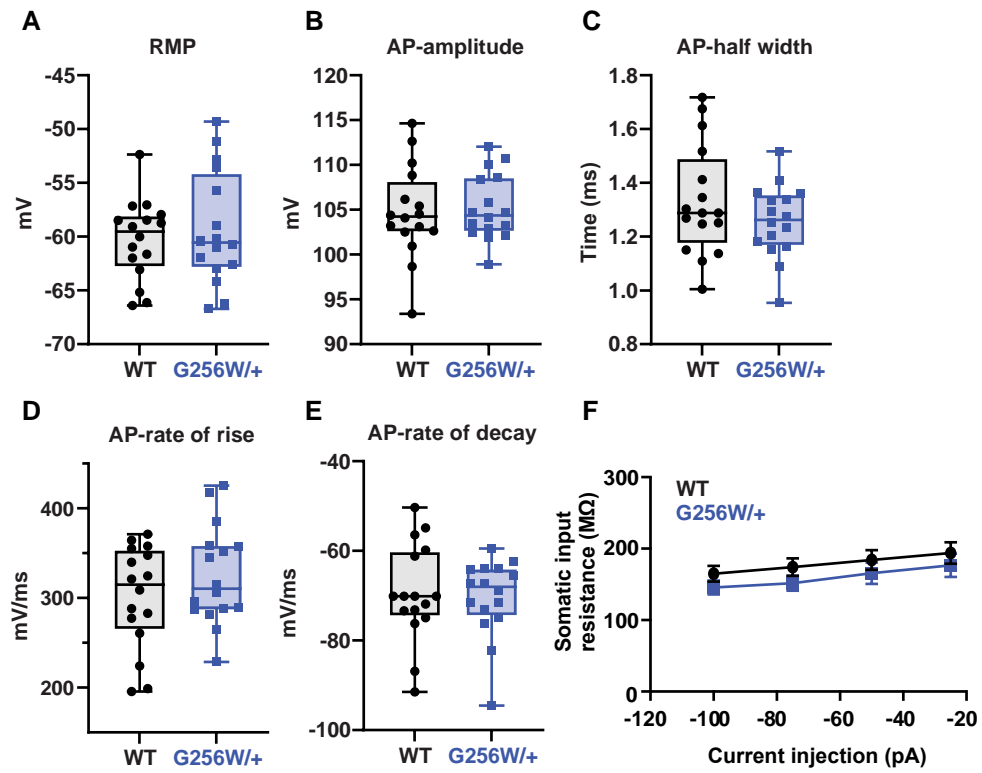

Figure 5—figure supplement 1

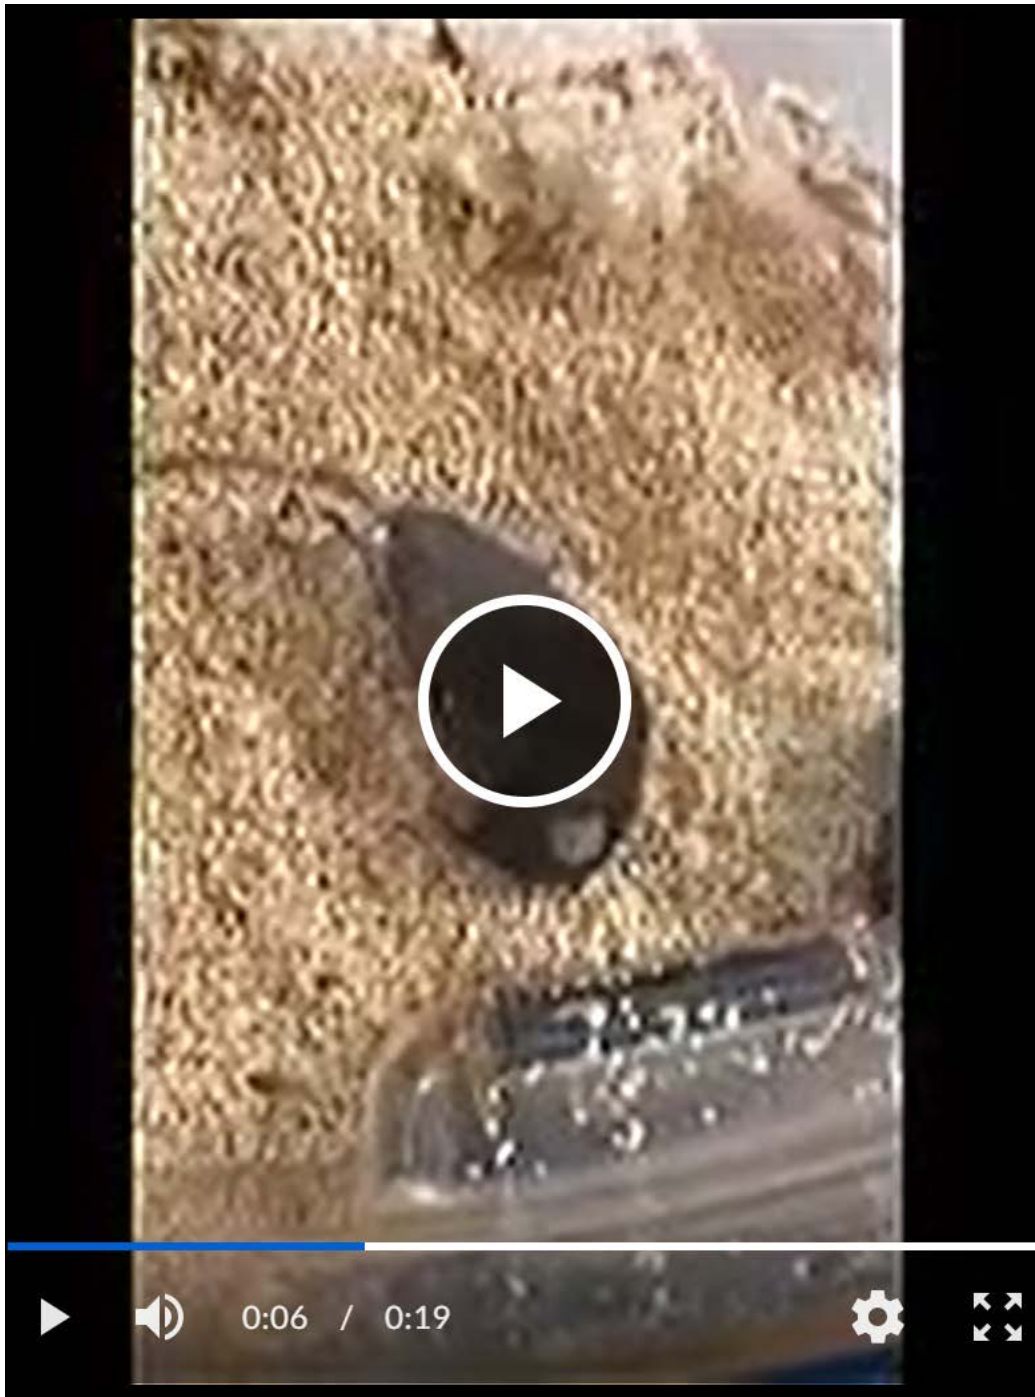

Figure 6—figure supplement 1

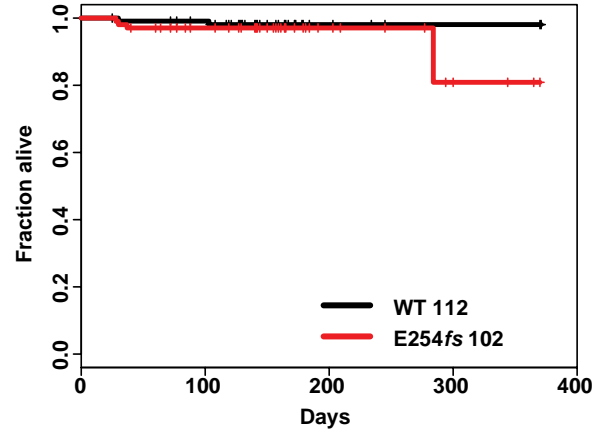

Figure 6—figure supplement 2

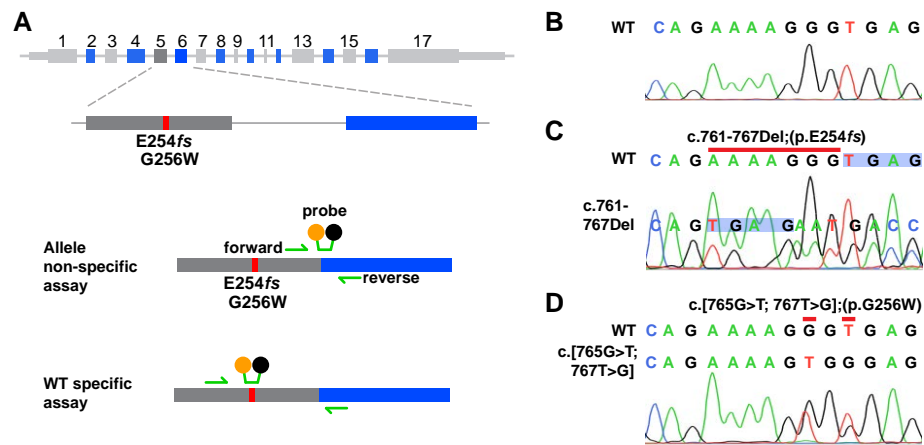

Figure 7—figure supplement 1

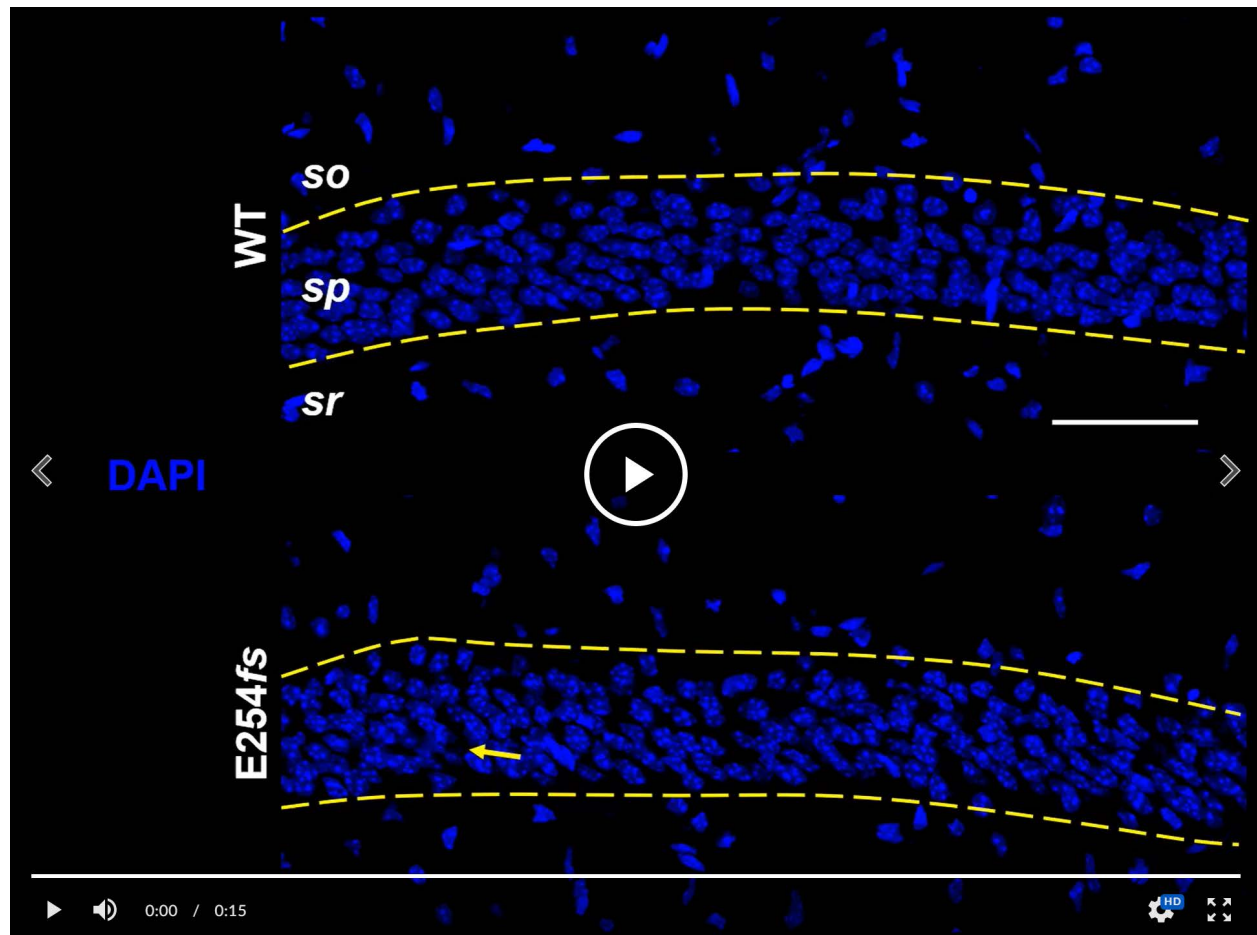

Figure 8— gure supplement 1

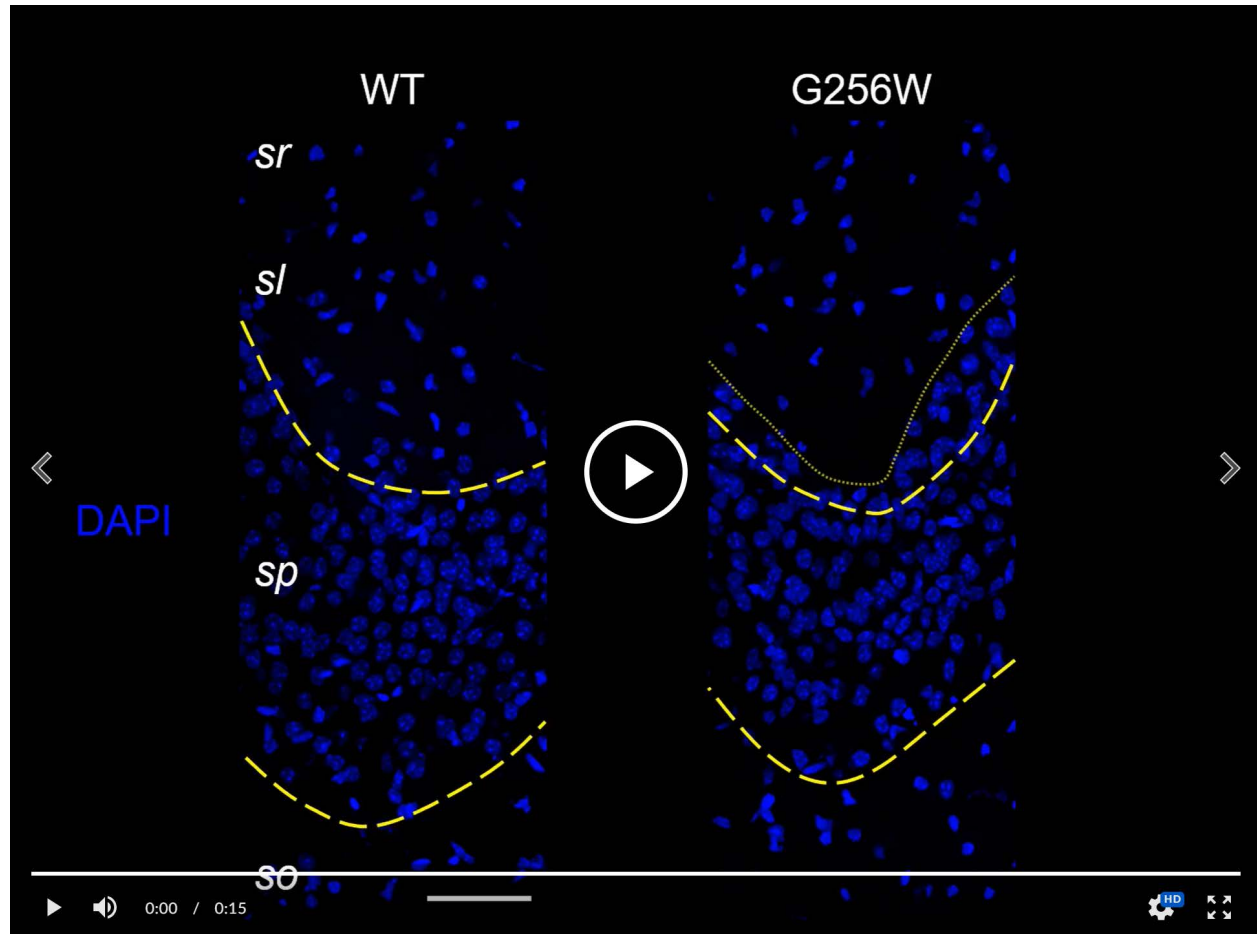

Figure 8—figure supplement 2



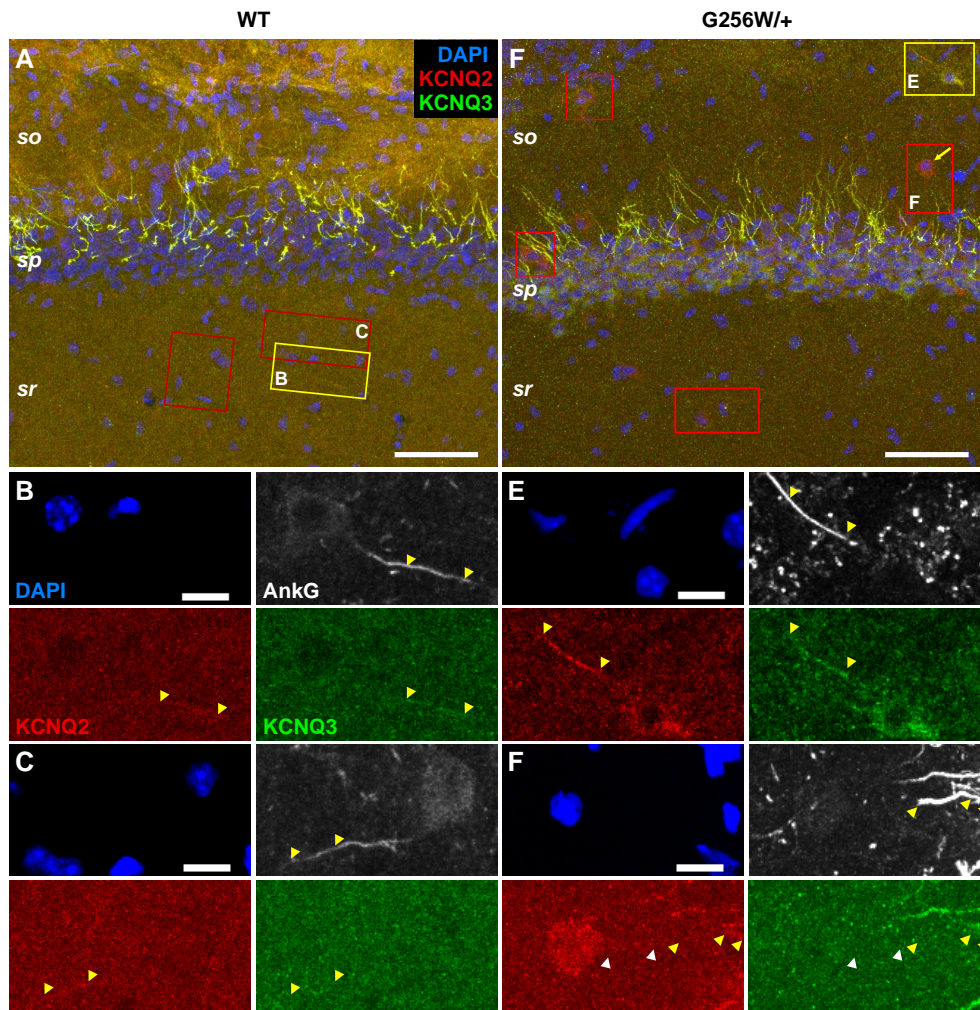

Figure 8—figure supplement 3

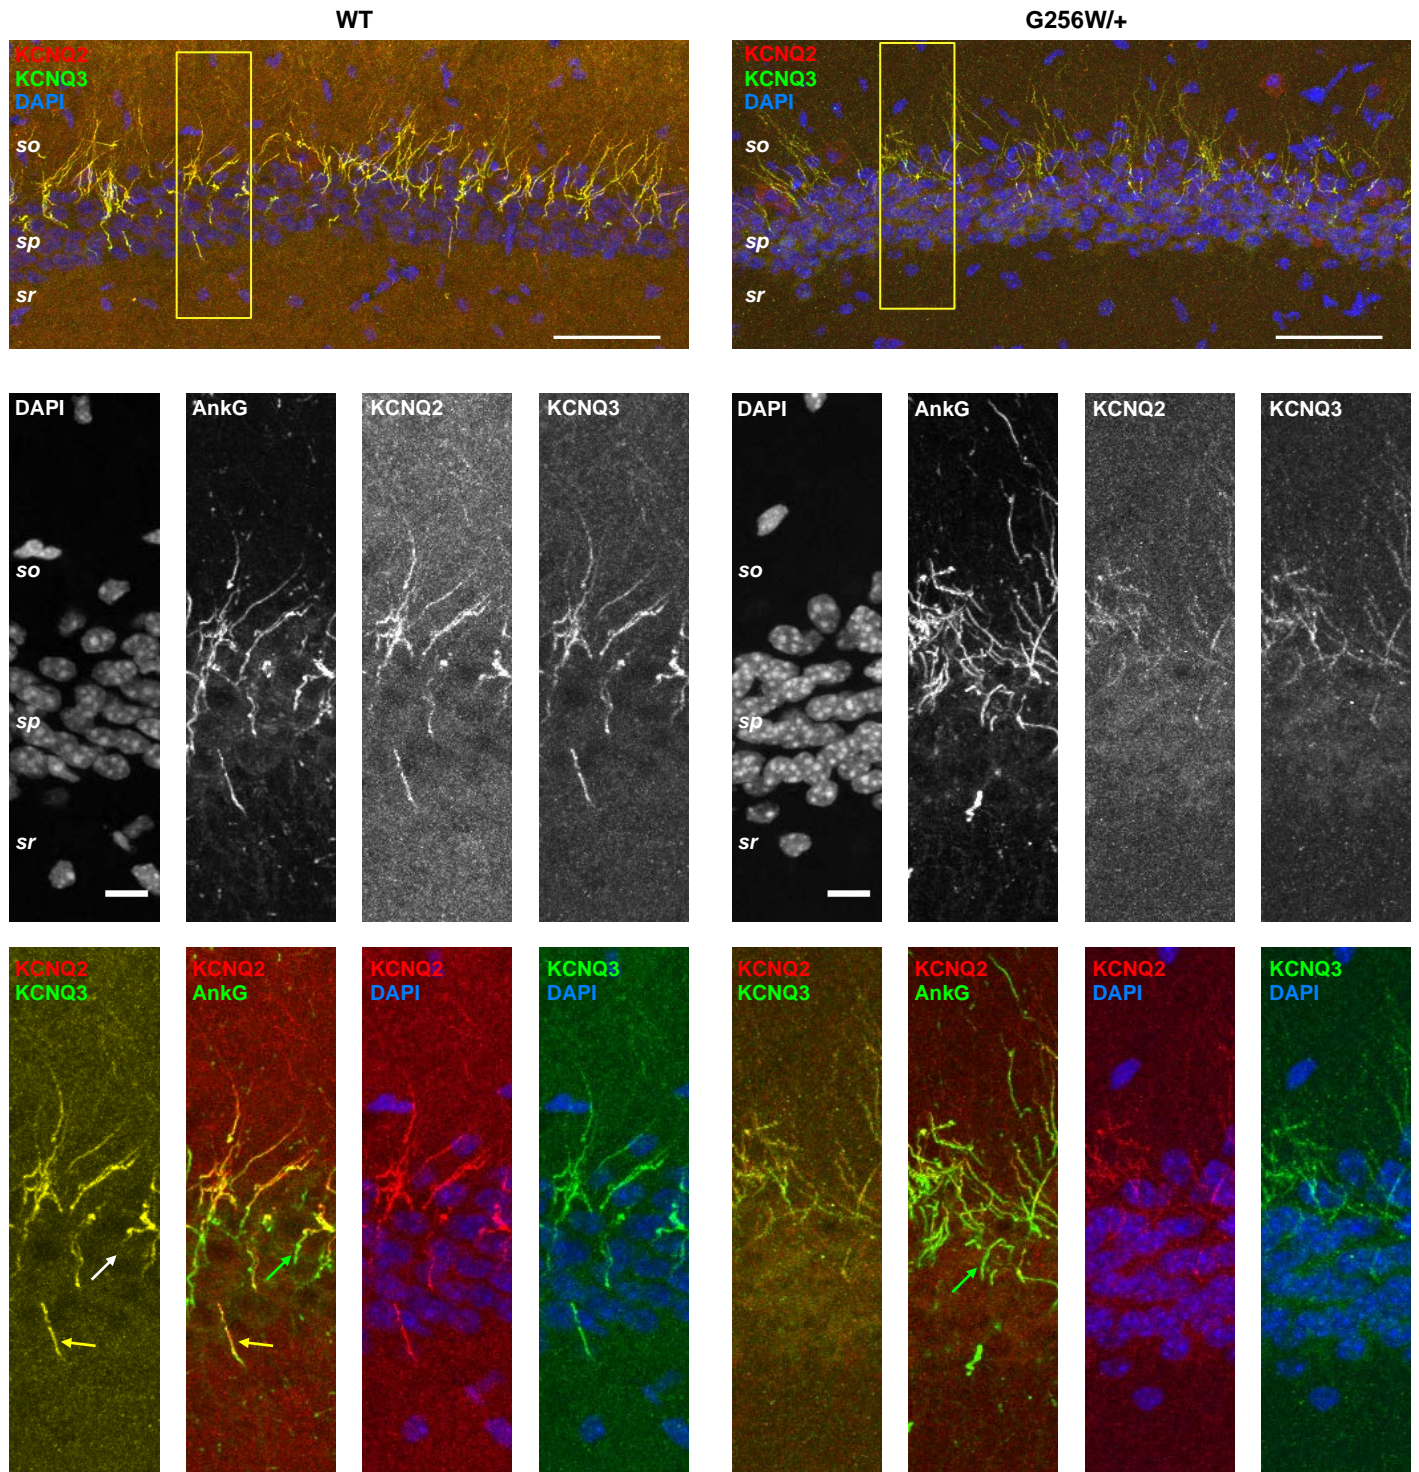

Figure 8—figure supplement 4

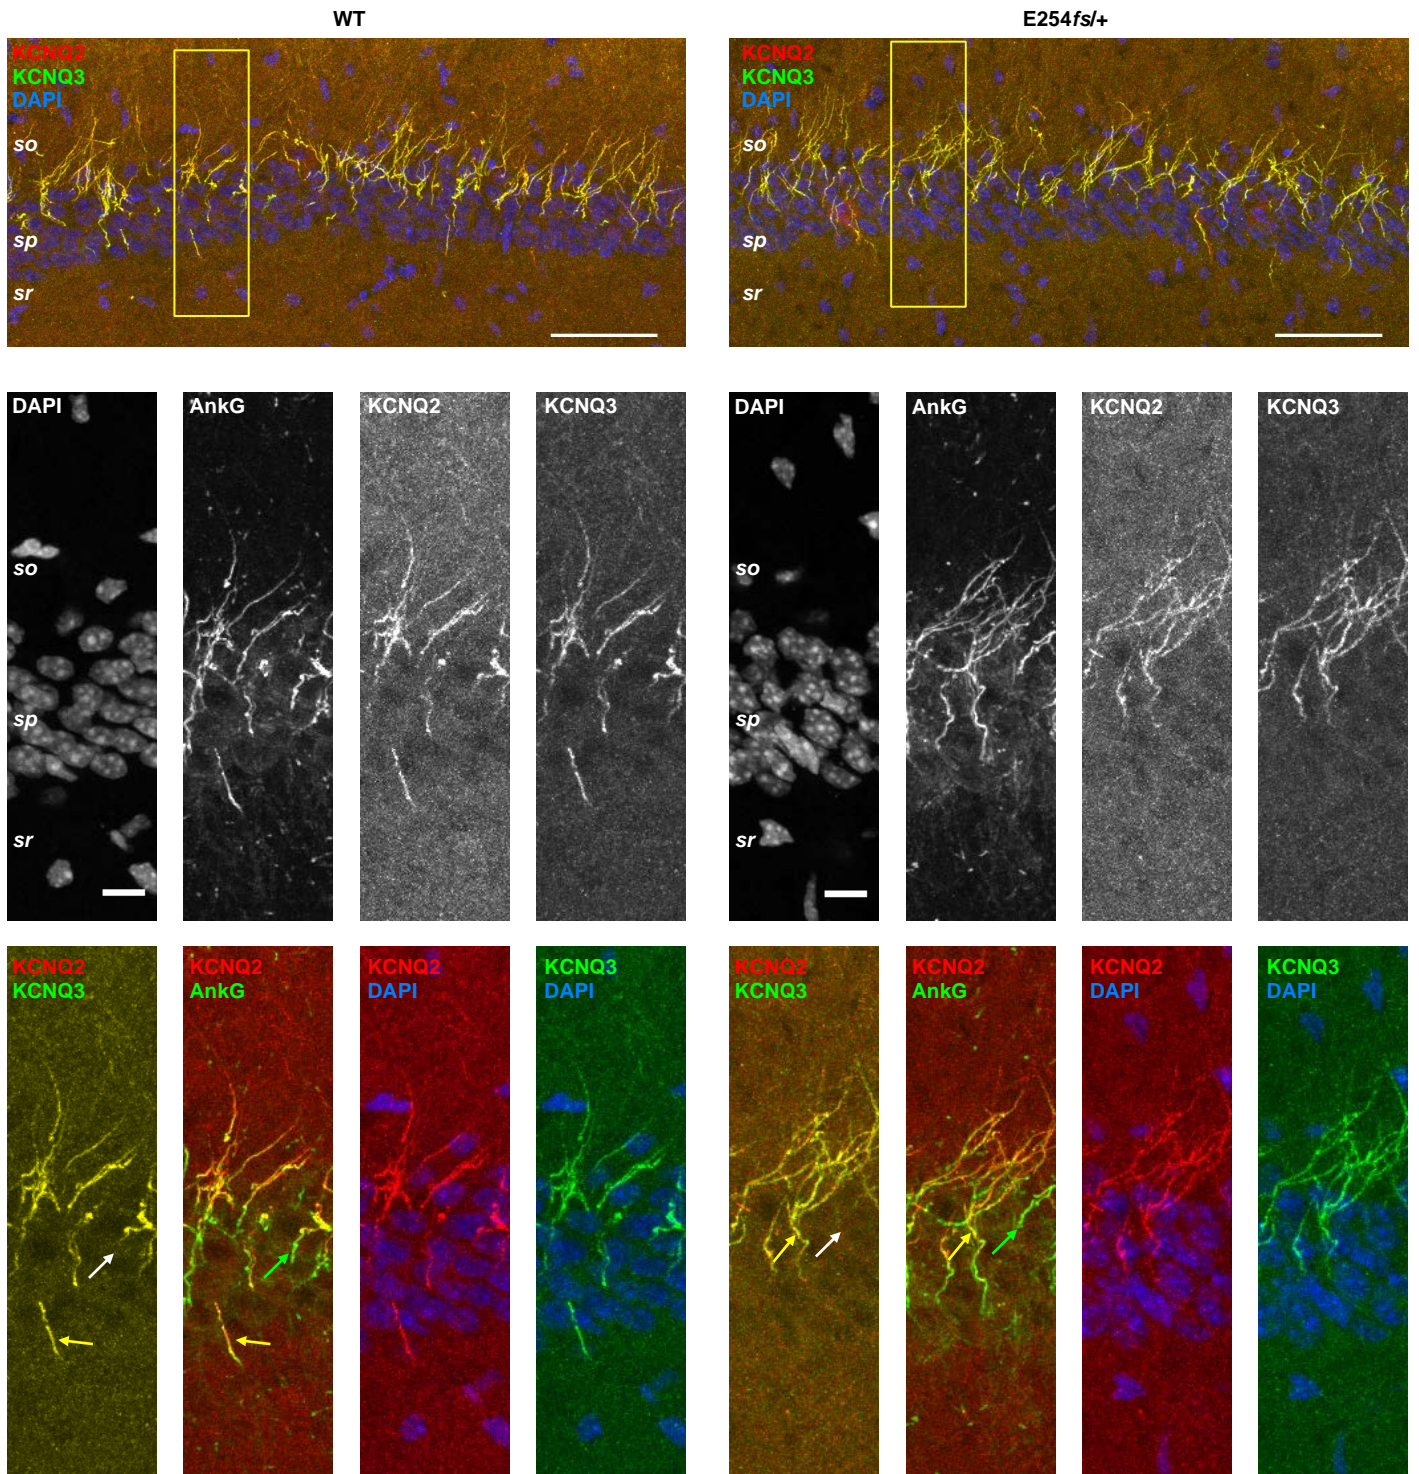

Figure 8—figure supplement 5

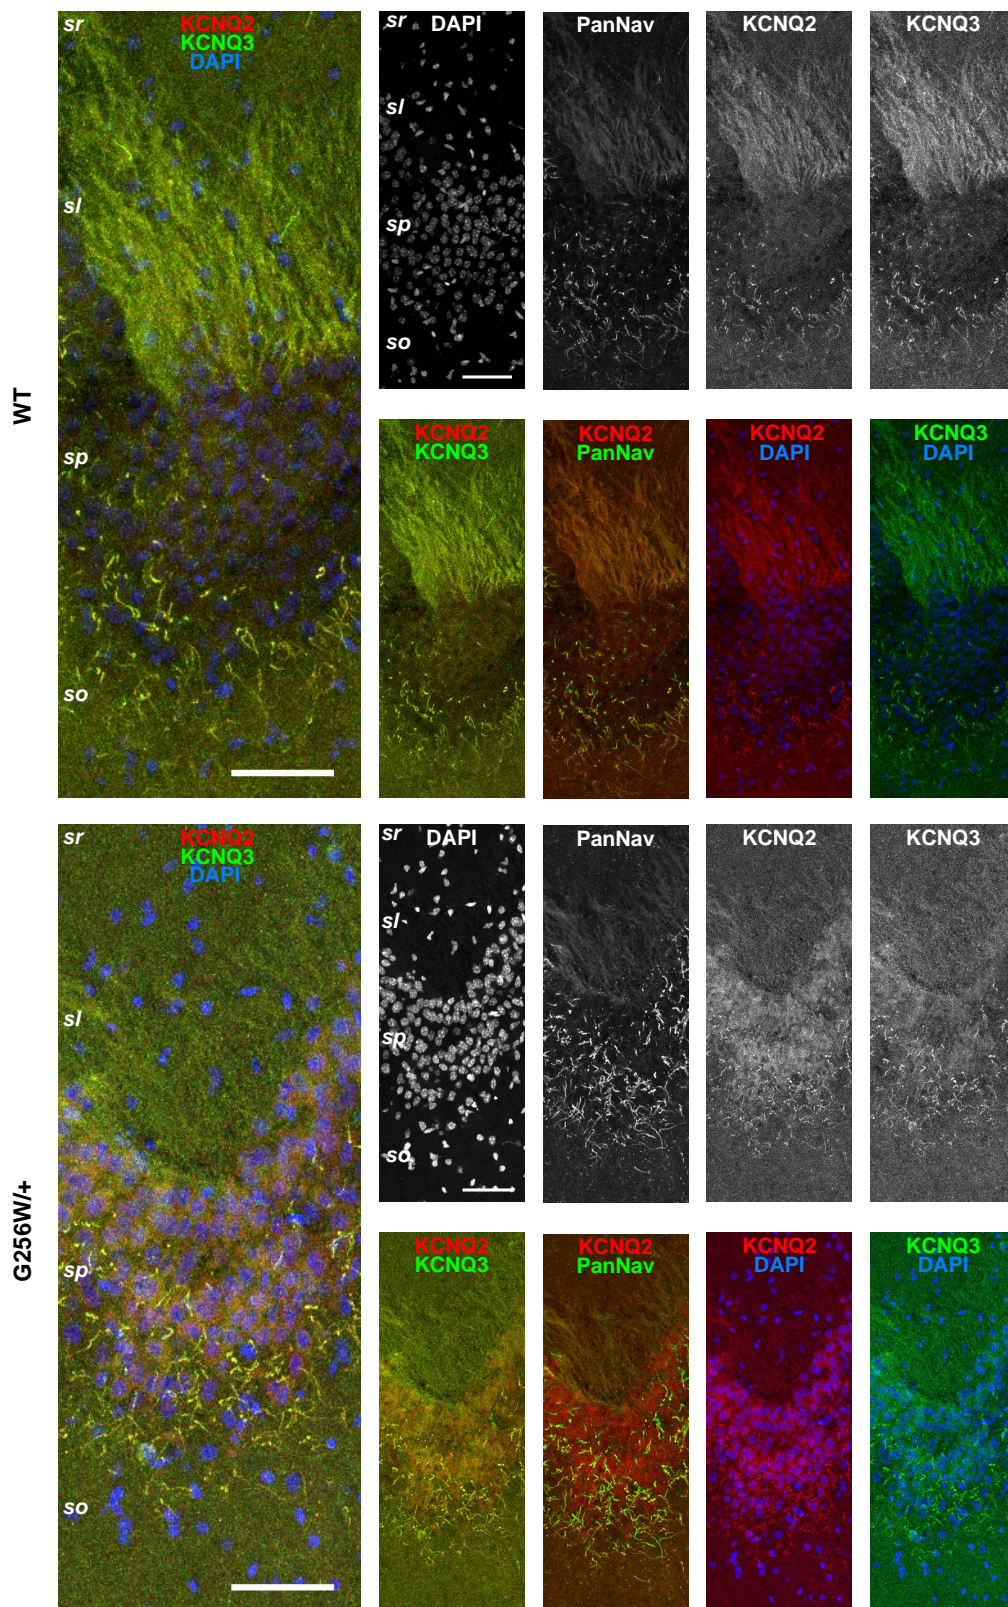

Figure 8—figure supplement 6

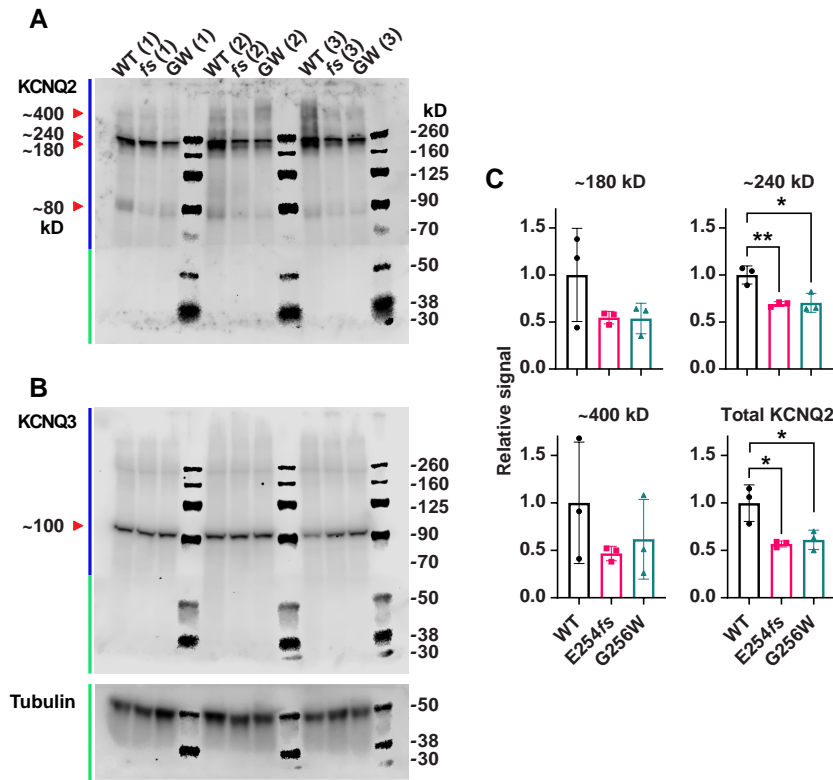

Figure 10—figure supplement 1
